# Supplementary material for: The Inverse Correlation Between the Duration of Lifetime Occupational Radiation Exposure and the Prevalence of Atrial Arrhythmia
Source: Frontiers journal article supplement (doi:10.3389/fcvm.2022.863939), 2022-05-30
Supplement: Data_Sheet_2.pdf [file Data_Sheet_2.pdf]

**Supplemental Table 1. Prevalence of Atrial Arrhythmia in Cardiologists Based on Characteristics (All Respondents Sample)**

|                             |                                  | # of Cardiologists<br>(%) n = 1471* | Prevalence of AA<br>(%) | p-value† |
|-----------------------------|----------------------------------|-------------------------------------|-------------------------|----------|
| Demographic Characteristics |                                  |                                     |                         |          |
| Sex                         | Male                             | 1262 (86.1%)                        | 156 (12.4%)             | <0.001   |
|                             | Female                           | 204 (13.9%)                         | 6 (2.9%)                |          |
| Age                         | ≥ 66 years                       | 490 (33.4%)                         | 105 (21.4%)             | <0.001   |
|                             | ≤ 65 years                       | 979 (66.6%)                         | 56 (5.7%)               |          |
| Race                        | White/Caucasian                  | 1167 (79.0%)                        | 148 (12.7%)             | <0.001   |
|                             | Black/African American           | 29 (2.0%)                           | 2 (6.9%)                |          |
|                             | Other                            | 269 (18.4%)                         | 12 (4.5%)               |          |
| Ethnicity                   | Hispanic                         | 36 (2.4%)                           | 3 (8.3%)                | 0.569    |
|                             | Non-Hispanic                     | 1265 (85.6%)                        | 144 (11.4%)             |          |
| Occupational History        |                                  |                                     |                         |          |
| Type of Cardiologist        | EP and Interventional Cardiology | 757 (51.2%)                         | 57 (7.5%)               | <0.001   |
|                             | Other                            | 721 (48.8%)                         | 107 (14.8%)             |          |
| Protective Attire worn      | Head Cap                         | 173 (11.7%)                         | 8 (4.6%)                | 0.004    |
|                             | Shin Shields                     | 27 (1.8%)                           | 3 (11.1%)               | 1.000    |
|                             | Front Shield                     | 915 (84.4%)                         | 82 (9.0%)               | <0.001   |
|                             | Vest or Apron                    | 1083 (73.3%)                        | 115 (10.6%)             | 0.333    |
| Social History              |                                  |                                     |                         |          |
| Hx of Alcohol Use           |                                  | 1104 (74.7%)                        | 134 (12.1%)             | 0.027    |
| Hx of Alcohol Abuse         |                                  | 88 (6.0%)                           | 15 (17.0%)              | 0.079    |
| Hx of Smoking               | Present, current                 | 32 (2.2%)                           | 7 (21.9%)               | <0.001   |
|                             | Absent, quit                     | 92 (6.3%)                           | 27 (29.3%)              |          |
|                             | Absent, never                    | 1343 (91.5%)                        | 124 (9.2%)              |          |

\*Sample number may vary due to exclusion of respondents electing to not answer

†Chi-squared test,  $p < 0.05$  is considered significant

**Supplemental Table 2. Prevalence of Atrial Arrhythmia in Cardiologists Performing Each Procedure**

| <b>All Respondents Sample</b>           | <b># of Cardiologists<br/>(%) n = 1478</b> | <b># of Cardiologists<br/>with AA (%)</b> | <b>Likelihood of AA<br/>Unadjusted OR<br/>(95% CI)<sup>a</sup></b> | <b>p-value<sup>b</sup></b> |
|-----------------------------------------|--------------------------------------------|-------------------------------------------|--------------------------------------------------------------------|----------------------------|
| <b>Procedure</b>                        |                                            |                                           |                                                                    |                            |
| Atherectomy                             | 469 (31.7%)                                | 38 (8.1%)                                 | 0.63 (0.41 - 0.98)                                                 | 0.038                      |
| Angiography                             | 666 (45.1%)                                | 76 (11.4%)                                | 0.92 (0.64 - 1.34)                                                 | 0.663                      |
| Coronary Thrombectomy                   | 523 (35.4%)                                | 45 (8.6%)                                 | 0.67 (0.44 - 1.02)                                                 | 0.063                      |
| Valve Replacement                       | 149 (10.1%)                                | 10 (6.7%)                                 | 0.51 (0.25 - 1.04)                                                 | 0.063                      |
| Valvuloplasty                           | 232 (15.7%)                                | 19 (8.2%)                                 | 0.64 (0.37 - 1.10)                                                 | 0.108                      |
| Congenital Heart Disease Repair         | 115 (7.8%)                                 | 7 (6.1%)                                  | 0.46 (0.21 - 1.05)                                                 | 0.065                      |
| Electrophysiologic Study                | 276 (18.7%)                                | 19 (6.9%)                                 | 0.53 (0.31 - 0.91)                                                 | 0.022                      |
| Irregular Rhythm Ablation               | 234 (15.8%)                                | 15 (6.4%)                                 | 0.49 (0.27 - 0.89)                                                 | 0.019                      |
| Pacemaker/Defibrillator Placement       | 497 (33.6%)                                | 61 (12.3%)                                | 1.00 (0.68 - 1.48)                                                 | 1.000                      |
| Pacemaker/Defibrillator Lead Extraction | 178 (12.0%)                                | 10 (5.6%)                                 | 0.43 (0.21 - 0.86)                                                 | 0.017                      |
| Percutaneous Angiography Intervention   | 652 (44.1%)                                | 70 (10.7%)                                | 0.86 (0.59 - 1.25)                                                 | 0.433                      |
| None of the Above                       | 440 (29.8%)                                | 54 (12.0%)                                | Reference Category                                                 |                            |
| <b>&gt;50 Years of Age Sample</b>       | <b># of Cardiologists<br/>(%) n = 1033</b> | <b># of Cardiologists<br/>with AA (%)</b> | <b>Likelihood of AA<br/>Unadjusted OR<br/>(95% CI)<sup>a</sup></b> | <b>p-value<sup>b</sup></b> |
| <b>Procedure</b>                        |                                            |                                           |                                                                    |                            |
| Atherectomy                             | 309 (29.9%)                                | 35 (11.9%)                                | 0.66 (0.42 - 1.05)                                                 | 0.077                      |
| Angiography                             | 480 (46.5%)                                | 69 (15.0%)                                | 0.87 (0.58 - 1.28)                                                 | 0.473                      |
| Coronary Thrombectomy                   | 358 (34.7%)                                | 42 (12.2%)                                | 0.69 (0.44 - 1.06)                                                 | 0.092                      |
| Valve Replacement                       | 65 (6.3%)                                  | 7 (11.5%)                                 | 0.62 (0.27 - 1.44)                                                 | 0.268                      |
| Valvuloplasty                           | 139 (13.5%)                                | 16 (11.9%)                                | 0.67 (0.37 - 1.22)                                                 | 0.193                      |
| Congenital Heart Disease Repair         | 63 (6.1%)                                  | 4 (6.6%)                                  | 0.35 (0.12 - 1.01)                                                 | 0.051                      |
| Electrophysiologic Study                | 170 (16.5%)                                | 18 (10.7%)                                | 0.61 (0.34 - 1.08)                                                 | 0.092                      |
| Irregular Rhythm Ablation               | 131 (12.7%)                                | 14 (10.8%)                                | 0.62 (0.33 - 1.16)                                                 | 0.133                      |
| Pacemaker/Defibrillator Placement       | 360 (34.8%)                                | 59 (16.9%)                                | 1.01 (0.67 - 1.52)                                                 | 0.959                      |
| Pacemaker/Defibrillator Lead Extraction | 106 (10.3%)                                | 10 (9.6%)                                 | 0.54 (0.26 - 1.10)                                                 | 0.089                      |
| Percutaneous Angiography Intervention   | 474 (45.9%)                                | 66 (14.6%)                                | 0.83 (0.56 - 1.24)                                                 | 0.371                      |
| None of the Above                       | 314 (30.4%)                                | 51 (16.2%)                                | Reference Category                                                 |                            |

<sup>a</sup>Odds ratio with 95% confidence interval - Reference: None of the above<sup>b</sup>p<0.05 is considered significant

**Supplemental Table 3. Prevalence of comorbidity in cardiologists based on presence of atrial arrhythmia (n = 1033)**

| All Responses                         |                                      | >50 Years of Age                                           |                                                               |             | <i>p</i> -value <sup>b</sup> |
|---------------------------------------|--------------------------------------|------------------------------------------------------------|---------------------------------------------------------------|-------------|------------------------------|
| Prevalence (%) n = 1478 <sup>a</sup>  | Prevalence (%) n = 1033 <sup>a</sup> | Prevalence of Comorbidity with AA (%) n = 152 <sup>a</sup> | Prevalence of Comorbidity without AA (%) n = 881 <sup>a</sup> |             |                              |
| Comorbidities                         |                                      |                                                            |                                                               |             |                              |
| Atrial Arrhythmia                     | 164 (11.1%)                          | 147 (14.7%)                                                |                                                               |             |                              |
| Aortic Atherosclerosis                | 40 (2.7%)                            | 40 (3.9%)                                                  | 16 (10.5%)                                                    | 24 (2.7%)   | <0.001                       |
| Cancer                                | 167 (11.3%)                          | 157 (15.2%)                                                | 29 (19.1%)                                                    | 128 (14.5%) | 0.149                        |
| Cardiomyopathy                        | 11 (0.7%)                            | 11 (1.1%)                                                  | 7 (4.6%)                                                      | 4 (0.5%)    | <0.001                       |
| Carotid Artery Disease                | 20 (1.4%)                            | 20 (1.9%)                                                  | 7 (4.6%)                                                      | 13 (1.5%)   | 0.019                        |
| Cataracts                             | 267 (18.1%)                          | 262 (25.4%)                                                | 50 (32.9%)                                                    | 212 (24.1%) | 0.021                        |
| Chronic Obstructive Pulmonary Disease | 13 (0.9%)                            | 12 (1.2%)                                                  | 5 (3.3%)                                                      | 7 (0.8%)    | 0.021                        |
| Congestive Heart Failure              | 11 (0.7%)                            | 11 (1.1%)                                                  | 7 (4.6%)                                                      | 4 (0.5%)    | <0.001                       |
| Coronary Artery Disease               | 129 (8.7%)                           | 128 (12.4%)                                                | 45 (29.6%)                                                    | 83 (9.4%)   | <0.001                       |
| Dermatitis                            | 44 (3.0%)                            | 37 (3.6%)                                                  | 2 (1.3%)                                                      | 35 (4.0%)   | 0.104                        |
| Diabetes Mellitus                     | 82 (5.5%)                            | 73 (7.1%)                                                  | 18 (11.8%)                                                    | 55 (6.2%)   | 0.013                        |
| Dyslipidemia                          | 400 (27.1%)                          | 352 (34.1%)                                                | 56 (36.8%)                                                    | 296 (33.6%) | 0.436                        |
| Hypertension                          | 450 (30.4%)                          | 407 (39.4%)                                                | 70 (46.1%)                                                    | 337 (38.3%) | 0.069                        |
| Infertility                           | 35 (2.4%)                            | 21 (2.0%)                                                  | 3 (2.0%)                                                      | 18 (2.0%)   | 1.000                        |
| Ischemic Heart Disease                | 50 (3.4%)                            | 50 (4.8%)                                                  | 18 (11.8%)                                                    | 32 (3.6%)   | <0.001                       |
| Myocarditis                           | 3 (0.2%)                             | 3 (0.3%)                                                   | 2 (1.3%)                                                      | 1 (0.1%)    | 0.058                        |
| Obstructive Sleep Apnea               | 118 (8.0%)                           | 108 (10.5%)                                                | 30 (19.7)                                                     | 78 (8.9)    | <0.001                       |
| Peripheral Vascular Disease           | 12 (0.8%)                            | 11 (1.1%)                                                  | 3 (2.0%)                                                      | 8 (0.9%)    | 0.212                        |
| Pulmonary Fibrosis                    | 4 (0.3%)                             | 4 (0.4%)                                                   | 3 (2.0%)                                                      | 1 (0.1%)    | 0.011                        |
| Pulmonary Hypertension                | 4 (0.3%)                             | 4 (0.4%)                                                   | 2 (1.3%)                                                      | 2 (0.2%)    | 0.105                        |
| Stroke/Transient Ischemic Attack      | 37 (2.5%)                            | 34 (3.3%)                                                  | 9 (5.9%)                                                      | 25 (2.8%)   | 0.049                        |
| Thyroid Disease                       | 95 (6.4%)                            | 76 (7.4%)                                                  | 15 (9.9%)                                                     | 61 (6.9%)   | 0.199                        |
| Valvular Heart Disease                | 46 (3.1%)                            | 43 (4.2%)                                                  | 16 (10.5%)                                                    | 27 (3.1%)   | <0.001                       |

<sup>a</sup>Sample number may vary due to exclusion of respondents electing to not answer<sup>b</sup>Chi-squared test, *p*<0.05 is considered significant

**Supplemental Table 4. Prevalence of Atrial Arrhythmia in Cardiologists Based on Characteristics (>50 Years of Age Respondents Sample)**

|                             |                                  | # of Cardiologists<br>(%) n = 1033* | Prevalence of AA<br>(%) | p-value† |
|-----------------------------|----------------------------------|-------------------------------------|-------------------------|----------|
| Demographic Characteristics |                                  |                                     |                         |          |
| Sex                         | Male                             | 915 (88.6%)                         | 144 (15.7%)             | 0.004    |
|                             | Female                           | 111 (10.7%)                         | 6 (5.4%)                |          |
| Age                         | ≥ 66 years                       | 490 (47.4%)                         | 105 (21.4%)             | <0.001   |
|                             | ≤ 65 years                       | 543 (52.6%)                         | 47 (8.7%)               |          |
| Race                        | White/Caucasian                  | 903 (87.4%)                         | 138 (15.3%)             | 0.379    |
|                             | Black/African American           | 17 (1.6%)                           | 2 (11.8%)               |          |
|                             | Other                            | 106 (10.3%)                         | 11 (10.4%)              |          |
| Ethnicity                   | Hispanic                         | 29 (2.8%)                           | 2 (6.9%)                | 0.294    |
|                             | Non-Hispanic                     | 876 (84.8%)                         | 133 (15.2%)             |          |
| Occupational History        |                                  |                                     |                         |          |
| Type of Cardiologist        | EP and Interventional Cardiology | 487 (47.1%)                         | 51 (10.5%)              | <0.001   |
|                             | Other                            | 546 (52.9%)                         | 101 (18.5%)             |          |
| Protective Attire worn      | Head Cap                         | 85 (8.2%)                           | 7 (8.2%)                | 0.078    |
|                             | Shin Shields                     | 18 (1.7%)                           | 2 (11.1%)               | 1.000    |
|                             | Front Shield                     | 609 (59.0%)                         | 75 (12.3%)              | 0.003    |
|                             | Vest or Apron                    | 744 (72.0%)                         | 105 (14.1%)             | 0.381    |
| Social History              |                                  |                                     |                         |          |
| Hx of Alcohol Use           |                                  | 791 (76.6%)                         | 123 (15.5%)             | 0.137    |
| Hx of Alcohol Abuse         |                                  | 63 (6.2%)                           | 14 (22.2%)              | 0.097    |
| Hx of Smoking               | Present, current                 | 23 (2.2%)                           | 7 (30.4%)               | <0.001   |
|                             | Absent, quit                     | 919 (89.0%)                         | 115 (12.5%)             |          |
|                             | Absent, never                    | 81 (7.8%)                           | 24 (29.6%)              |          |

\*Sample number may vary due to exclusion of respondents electing to not answer

†Chi-squared test,  $p < 0.05$  is considered significant
